# Supplementary material
Source: Springer Nature journal article supplement (https://www.springermedizin.de/resource/supplementary/13561_2012_60_MOESM6_ESM.docx/9687336)

**Figure 3a: Cost-effectiveness acceptability curve: preterm infants <29 wGA**

***
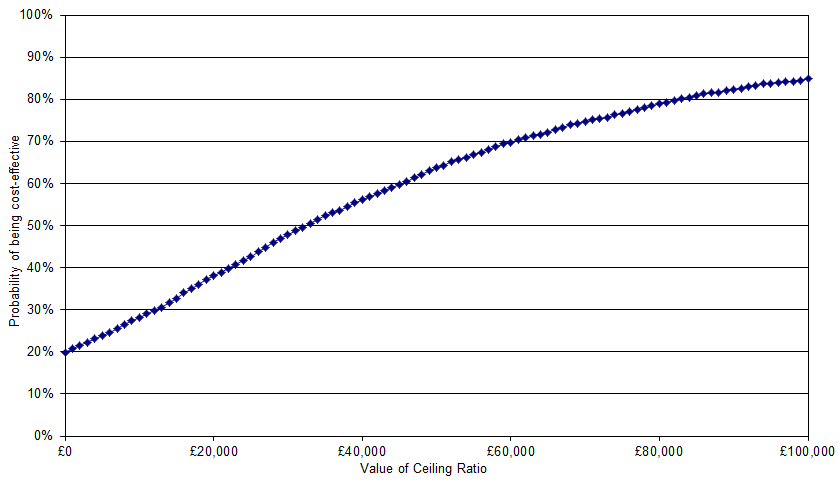
***

Supplement: MOESM6 [file 9687336]
